# Supplementary material for: Deleting Mecp2 from the cerebellum rather than its neuronal subtypes causes a delay in motor learning in mice
Source: eLife. 2021 Jan 26;10:e64833. doi: 10.7554/eLife.64833 (PMC7837679; doi:10.7554/eLife.64833)
Supplement: Figure 1—source data 1. [file elife-64833-fig1-data1.xlsx]

## Sheet: Sheet1
NeuN	Calb	Parv
97.13	99.31	98.66
97.22	98.55	97.92
98.45	96.38	96.91
99.69	97.16	99.89
