# Supplementary material for: Deleting Mecp2 from the cerebellum rather than its neuronal subtypes causes a delay in motor learning in mice
Source: eLife. 2021 Jan 26;10:e64833. doi: 10.7554/eLife.64833 (PMC7837679; doi:10.7554/eLife.64833)
Supplement: Figure 2—figure supplement 1—source data 1. [file elife-64833-fig2-figsupp1-data1.xlsx]

## Sheet: Fig. 2-supplement 1
	Flox			KO
Cerebellum	0.99	0.98	1.02	0.01	0.02	0.01
Hippocampus	0.84	1.09	1.06	0.98	0.97	1.03
