# Supplementary material for: Deleting Mecp2 from the cerebellum rather than its neuronal subtypes causes a delay in motor learning in mice
Source: eLife. 2021 Jan 26;10:e64833. doi: 10.7554/eLife.64833 (PMC7837679; doi:10.7554/eLife.64833)
Supplement: Figure 2—figure supplement 3—source data 1. [file elife-64833-fig2-figsupp3-data1.xlsx]

## Sheet: A
	WT													Cre													Flox													KO
1	130	51	173	130	159	66	149	129	104	84	84	111	176		100	97	164	83	129	50	121	93	111	117			169	127	181	133	125	173	148	118	232	138	138	71	122		125	188	97	188	77	123	92	74	132
2	187	223	234	177	101	217	224	222	156	175	177	158	233		96	151	208	168	183	179	184	213	162	226			165	110	146	208	162	194	147	134	206	119	218	169	214		209	220	202	157	180	120	152	104	170
3	272	261	279	193	160	191	245	140	158	238	195	207	286		172	181	231	154	164	226	161	241	185	277			196	140	186	228	172	209	188	198	220	190	250	203	230		180	221	204	172	198	199	174	159	213
4	291	252	279	176	197	199	229	192	175	322	210	150	308		145	174	249	186	193	210	253	319	296	289			206	180	201	220	198	173	204	223	231	272	202	230	227		213	223	243	299	140	187	215	201	234
[truncated: 4 more columns]

## Sheet: B
	WT													Cre													Flox													cKO
1	178	126	190	116	118	188	135	136	221	156	118	83	115		177	128	116	199	69	116	88	82	125	112	148	112		115	71	161	136	146	80	146	145	118	75	95	99	158		100	116	156	100	120	68	105	87
2	185	120	128	198	170	204	155	124	221	103	202	169	208		228	238	192	171	162	107	159	108	182	149	154	190		187	223	236	160	116	214	213	215	149	173	161	153	222		109	162	200	162	186	182	184	228
3	180	134	167	227	192	201	198	200	238	209	245	198	232		211	291	200	185	192	217	154	153	230	207	237	195		256	246	263	178	142	172	237	155	163	250	208	219	305		159	192	232	153	157	232	172	226
4	223	200	218	238	217	165	221	235	216	256	212	250	215		212	273	263	300	156	170	233	199	215	179	232	258		303	260	274	163	203	204	216	194	173	322	222	145	303		149	173	267	171	185	230	251	321
[truncated: 2 more columns]

## Sheet: C
WT	Cre	Flox	KO
33.2	22.3	44.1	13.6
38.2	16.5	35.3	14.4
19.2	27.1	24.4	32.1
26.1	21.1	14.8	13.3
18.9	19.8	36.2	19.3
18.1	39.3	14.3	10.8
22.2	27.8	30.5	45
35.2	18.3	18.1	23.8
27.7	26.5	14.1	19.8
26.5	33.1	10.5	13.4
30.6	8.1	13.1	27.1
21.7	21.2	18.2	18.9
25.4	17.3	37.9	32.7
24.6	22.8	30.7	10.2
15.1	22.1	16.1	30.3
	20.9	15.5	33.8
		32.3

## Sheet: D
WT	Cre	Flox	KO
4279	4641	5111	3191
3157	4854	4423	3996
3947	4889	4591	3816
4726	4518	2635	4204
3545	2829	3821	3262
4387	4194	3271	4244
3641	4478	3116	4812
2853	3896	2473	2704
4922	4381	4333	3410
2628	2942	3482	3316
3367	4437	4686	3841
2891	2803	2542	3613
4598	4654	2753	2804
4476	4374	2687	3005
3263	4579	4305	2192
	3723	4096	3132
		4019

## Sheet: E
WT	Cre	Flox	KO
0.2	0.18	0.14	0.17
0.12	0.14	0.16	0.1
0.14	0.16	0.13	0.19
0.14	0.17	0.15	0.11
0.18	0.18	0.19	0.13
0.17	0.13	0.15	0.11
0.12	0.14	0.11	0.11
0.15	0.15	0.16	0.2
0.15	0.13	0.15	0.16
0.1	0.16	0.12	0.15
0.17	0.17	0.13	0.16
0.2	0.1	0.25	0.15
0.16	0.18	0.18	0.27
0.12	0.17	0.22	0.17
0.2	0.14	0.12	0.13
	0.1	0.15	0.12
		0.16

## Sheet: F
WT	Cre	Flox	cKO
180	180	180	180
180	180	180	180
180	180	180	180
180	167	180	90
180	73	120	180
180	120	180	180
180	180	180	180
134	180	130	180
180	180	172	180
180	180	180	180
180	180	180	180
178	178	150	180
145	180	180	180
178	180	180	180
180	160	160	180
	180	180	128
		180

## Sheet: G
WT	Cre	Flox	KO
510.1	634.5	799	418.9
449.8	596.5	413.3	444.4
507.1	491.7	349	624.8
466.1	1089.6	235.1	728.9
1070.7	374.6	234.9	315
446.6	755.3	228.6	444.8
1379.1	798.6	1124.6	428.6
638.2	1388.9	326.3	1036.6
379.2	636.2	370.8	727.5
708	481.1	568	714.4
261.5	648.9	459.3	653.9
1230.3	789.2	297.8	1006
418.3	685.7	535.9	1118.6
390.1	663.1	556.3	298.9
591.1	667.5	1286.3	396.1
	591	628.3	1128.1
		736.3

## Sheet: H
	WT																		Cre																		Flox
74 db	21.9	34.4	19.2	35.7	41.1	39.9	8.5	31.7	25.8	29.8	24.6	18.8	35.2	33.8	34.6				14.9	35.5	36.3	25.5	15.3	9.4	30.3	34.5	32.6	18.4	33	19.2	6.4	40.5	15.7	13.5			33.9	14.5	53.3	60.2	31.6	16.8	24.7	9.5	3.3	52.4	50.3	45.6	61.7
78 db	56.8	69.8	64.5	61.6	50.9	54.6	56.6	50.1	73.1	41.4	50.2	48.2	51.1	67.1	49.2				59.8	54.3	39.1	49	55.4	38.1	78.3	36.2	42	24.8	57.7	24.2	24.9	45	26.7	51.5			52.5	50.2	63.9	84.4	65.1	24.1	46.2	61.4	45.4	69.7	65.1	25.4	81.8
82 db	77.3	88.6	89.6	81.1	67.9	59.3	60.6	77.3	64.1	66.5	70.8	84.6	80.5	60.6	95.3				63.3	86.6	80.6	81.6	86.9	65.3	74.1	69.8	60.6	73.1	58.6	79.6	61.2	51.6	72.1	65			82.4	42.6	80.5	92.1	77.7	61.9	53.1	72.8	69.3	86.8	79.5	69.4	87.2
[truncated: 20 more columns]

## Sheet: I
	WT																	Cre																	Flox
Object	194.4	165.8	106.4	169	157.2	192	107.5	148.5	226.4	173.8	211.5	165.1	173	100.1	120.1			137.8	196	116.1	126.9	175	251.1	159.3	141	284.1	192.3	123	176.1	143.2	154.9	165.9	101.1		84.6	169.9	46.5	147.3	176.8	148.7	200	176.7	151.5	107.5	164.7	193.1	134.1	154.4	167.1
Mouse	245.5	334.2	384.6	279.6	365.2	275.6	358.6	345.6	226	325.3	241.1	232.1	214.9	200.1	250.1			378.7	323.5	293.8	315.5	250	280.9	379.8	299	264.9	313.8	248.1	234.3	205.4	256.3	273.2	231.4		297.5	317.7	312	301.4	334.8	386.8	351	327.8	325.1	280	242.8	256.8	250.1	212.8	251.3
[truncated: 18 more columns]

## Sheet: J
WT	Cre	Flox	cKO
49.58	47.52	41.41	36.42
50.45	44.99	71.86	38.43
45.65	44.83	62.42	52.94
35.34	64.24	57.61	53.92
43.76	39.14	42.42	64.34
69.89	31.99	62.12	49.47
49.7	45.67	48	70.96
59.41	34.54	43.54	35.85
31.58	67.32	39.66	47.46
39.06	45.11	64.44	40.91
35.3	46.5	48.53	31.8
34.3	36.6	34.6	31.5
32.1	52.6	40	41.5
59.2	30.9	40.3	48.4
59.1	32	58.7	36.4
	41.8	41.8	46.7
		55.1

[truncated: 1 more sheets: K]
