# Supplementary material for: Deleting Mecp2 from the cerebellum rather than its neuronal subtypes causes a delay in motor learning in mice
Source: eLife. 2021 Jan 26;10:e64833. doi: 10.7554/eLife.64833 (PMC7837679; doi:10.7554/eLife.64833)
Supplement: Figure 2—source data 1. [file elife-64833-fig2-data1.xlsx]

## Sheet: B
	WT																		Cre																		Flox
Day 1	136	187	167	198	173	118	181	123	141	158	128	174	113	123	138				186	101	183	146	116	182	112	159	106	112	126	118	114	130	131	142			209	109	147	140	110	201	171	156	137	169	139	131	165
Day 2	167	154	171	167	167	156	165	168	138	184	148	150	179	173	206				162	218	162	158	215	181	228	171	166	142	149	173	176	146	193	149			154	144	158	153	139	244	177	189	112	170	183	140	151
Day 3	174	191	186	205	211	173	229	169	157	187	182	179	205	209	231				247	199	176	222	166	218	162	122	152	192	137	154	183	165	188	172			189	129	135	114	120	271	193	248	137	266	259	186	216
Day 4	232	217	198	242	224	193	338	232	207	189	236	186	241	236	257				240	244	213	335	224	197	234	162	168	189	152	152	160	171	182	226			213	131	135	218	170	231	211	252	190	255	292	189	212
[truncated: 20 more columns]

## Sheet: C
Atoh1	WT													Cre													Flox													KO
Day 1	128	174	113	123	138	136	116	122	105	198	103			167	90	122	119	125	131	99	97	100	108	87	143		112	158	168	169	150	176	172	120	102	110	145	101	145		148	121	156	176	135	132	169	149	119
Day 2	148	150	179	173	206	171	181	184	194	177	167			170	155	155	148	167	174	189	178	189	143	178	199		162	208	208	126	211	198	170	184	164	109	198	154	132		209	153	192	167	191	151	149	186	152
Day 3	182	179	205	209	231	214	226	182	218	222	223			194	201	198	212	215	174	192	200	212	245	200	230		186	208	232	175	211	181	206	229	189	200	201	187	198		240	167	200	177	188	168	199	210	179
Day 4	206	188	241	236	217	212	245	205	241	245	286			207	190	203	209	207	243	201	235	230	219	203	276		172	203	215	153	186	182	238	261	203	300	205	216	254		212	195	203	193	180	199	189	192	175
L7	WT												Cre												Flox												KO
Day 1	133	118	181	123	141	158	128	174	213	123	132		187	142	121	119	105	209	174	191	155	192	82	100		136	193	196	118	202	130	134	168	159	176		129	111	154	139	195	160	123	121	192	109
Day 2	167	167	156	165	168	138	184	148	150	179	201		157	158	152	165	168	204	200	152	202	200	145	167		172	171	220	125	214	173	110	215	170	206		176	184	122	229	214	178	136	165	186	198
Day 3	205	211	173	229	169	157	187	182	179	205	213		175	207	192	177	207	196	222	227	232	233	161	198		151	156	169	162	148	155	156	170	205	215		189	261	145	239	248	217	123	135	133	232
Day 4	242	224	193	238	232	307	189	266	222	241	301		206	226	227	242	213	265	233	224	232	228	190	203		179	248	210	186	205	180	171	272	177	235		210	217	172	208	203	236	188	174	183	254
Ptf1a	WT													Cre													Flox													KO
Day 1	93	182	138	190	84	156	94	165	147	153	184			114	108	117	123	106	183	132	124	124	136	189	141		123	107	116	139	159	141	136	117	155	115	110	136	153		170	154	150	142	198	150	104	147	191
Day 2	198	188	107	177	175	172	192	166	177	174	176			168	199	196	169	160	181	171	192	160	169	168	160		161	162	168	165	200	179	180	180	193	176	198	185	168		189	188	195	186	179	165	184	199	187
Day 3	192	194	219	230	181	175	176	220	193	214	225			186	233	189	189	186	146	188	145	191	235	203	190		185	230	211	263	294	208	184	179	229	215	224	192	211		178	200	211	212	234	196	198	213	220
Day 4	200	263	193	232	243	273	275	262	256	283	208			209	217	153	261	225	231	230	133	232	214	253	262		220	208	215	231	266	246	270	254	192	219	226	223	225		276	191	252	279	253	257	257	227	241
[truncated: 4 more columns]

## Sheet: D
Probability	Flox												KO
1	0	0	0	0	0	0	0	0					0	0	0	0	0	0.02	0	0
2	0	0	0.02	0.01	0	0	0.02	0					0.01	0	0	0	0	0	0	0
3	0	0	0	0.28	0.38	0.02	0	0					0	0.02	0	0	0	0	0	0
4	0.3	0.06	0.16	0.56	0.75	0.42	0.23	0.26					0	0.35	0	0	0	0	0.03	0
5	0.7	0.65	0.48	0.73	0.81	0.4	0.35	0.44					0.17	0.09	0	0	0.11	0.01	0.15	0
6	0.47	0.73	0.42	0.57	0.79	0.52	0.56	0.42					0.65	0.82	0.17	0.01	0.21	0	0.48	0
7	0.56	0.88	0.75	0.74	0.69	0.7	0.7	0.49					0.78	0.83	0.41	0.28	0.47	0.05	0.63	0.09
8	0.81	0.92	0.87	0.63	0.75	0.73	0.49	0.47					0.92	0.87	0.58	0.63	0.5	0.25	0.7	0.06
9	0.33	0.7	0.98	0.68	0.84	0.56	0.65	0.75					0.87	0.91	0.79	0.67	0.81	0.53	0.66	0.23
10	0.59	0.85	0.79	0.72	0.77	0.71	0.55	0.66					0.84	0.88	0.29	0.72	0.86	0.66	0.68	0.35
11	0.76	0.96	0.77	0.64	0.65	0.69	0.65	0.59					0.85	0.93	0.32	0.9	0.74	0.81	0.8	0.46
12	0.57	0.89	0.79	0.63	0.79	0.58	0.7	0.64					0.91	0.9	0.48	0.83	0.86	0.88	0.62	0.63
Amplitude	Flox												KO
1	0.02	0.03	0.07	0.01	0	0.02	0.01	0.02					0.02	0.01	0	0	0.01	0.05	0.02	0.02
2	0.01	0.01	0.01	0.06	0	0.04	0.04	0.01					0	0.01	0	0	0.02	0	0.01	0.01
3	0.01	0	0.01	0.12	0.16	0.06	0.02	0.02					0	0.03	0	0	0.05	0	0.03	0.01
4	0.23	0.28	0.28	0.22	0.33	0.27	0.26	0.14					0.03	0.17	0	0	0.07	0.01	0.07	0.02
5	0.3	0.25	0.28	0.34	0.43	0.25	0.28	0.17					0.03	0.07	0.05	0	0.07	0.01	0.1	0.03
6	0.2	0.41	0.28	0.29	0.33	0.22	0.19	0.16					0.15	0.15	0.12	0.05	0.1	0.04	0.17	0.05
7	0.21	0.51	0.33	0.39	0.29	0.33	0.28	0.21					0.35	0.46	0.19	0.12	0.19	0.09	0.23	0.06
8	0.45	0.61	0.42	0.33	0.36	0.39	0.18	0.21					0.42	0.46	0.23	0.22	0.2	0.13	0.31	0.06
9	0.18	0.5	0.57	0.4	0.49	0.3	0.31	0.34					0.47	0.54	0.28	0.27	0.38	0.2	0.34	0.11
10	0.31	0.59	0.35	0.48	0.4	0.39	0.29	0.35					0.4	0.43	0.15	0.36	0.52	0.26	0.38	0.14
11	0.52	0.72	0.4	0.29	0.32	0.39	0.3	0.28					0.43	0.64	0.15	0.56	0.48	0.37	0.51	0.2
12	0.32	0.71	0.47	0.36	0.45	0.33	0.34	0.25					0.53	0.52	0.2	0.46	0.62	0.48	0.38	0.38
