# Supplementary material for: Deleting Mecp2 from the cerebellum rather than its neuronal subtypes causes a delay in motor learning in mice
Source: eLife. 2021 Jan 26;10:e64833. doi: 10.7554/eLife.64833 (PMC7837679; doi:10.7554/eLife.64833)
Supplement: Figure 3—source data 1. [file elife-64833-fig3-data1.xlsx]

## Sheet: 3D
SS Hz	Flox	cKO
	79.16	83.35
	58.79	81.14
	100.58	71.47
	70.12	102.27
	67.61	81.2
	98.68	66.12
	143.65	129.1
	81.94	80.09
	99.66	86.09
	80.12	87.98
	128.03	105.85
	146.6	83.57
	122.48	110.53
	84.63	28.29
	176.24	130.08
	130.39	72.46
	132.74	80.65
	131.68	56.88
	56.73	92.85
	53.46	105.54
	89.69	118.47
	97.82	66.34
	43.38	139.01
	96.02	105.54
	119.35
CS Hz	Flox	cKO
	0.99	1.16
	1.96	1.48
	0.68	1.55
	1.22	1.65
	1.11	1.35
	1.15	1.61
	1.46	1.44
	0.92	1.27
	1.07	1.46
	1.64	1.06
	0.74	1.37
	1.64	1.18
	1.62	1.52
	1.27	1.05
	1.31	1.42
	0.69	0.77
	1.33	1.1
	1.41	1.48
	1.5	1.28
	1.17	1.34
	1.39	1.62
	1.26	1.06
	1.03	1.04
SS CV	Flox	cKO
	0.47	0.6
	0.36	0.41
	0.36	0.53
	0.36	0.5
	0.32	0.44
	0.33	0.44
	0.48	0.44
	0.33	0.55
	0.33	0.61
	0.31	0.61
	0.46	0.39
	0.45	0.58
	0.39	0.45
	0.36	0.61
	0.35	0.8
	0.4	0.75
	0.58	0.53
	0.56	0.65
	0.45	0.53
	0.95	0.57
	0.42	0.6
	0.46
SS CV2	Flox	cKO
	0.4	0.35
	0.41	0.3
	0.32	0.57
	0.33	0.41
	0.34	0.56
	0.28	0.29
	0.29	0.36
	0.42	0.35
	0.29	0.45
	0.27	0.49
	0.25	0.38
	0.28	0.3
	0.37	0.4
	0.42	0.33
	0.25	0.38
	0.32	0.49
	0.27	0.41
	0.31	0.49
	0.52	0.49
	0.39	0.38
	0.35	0.42
	0.37	0.32
	0.56	0.36
	0.31	0.52
	0.31

## Sheet: 3E
Sholl	Flox				cKO
10	3.1	4.94	5.16		2.93	3.74	3.17
20	8.6	11.41	6.54		10.95	7.37	9.8
30	9.08	13.28	9.06		11.04	10.16	12.87
40	11.33	14.47	10.24		12.73	14.53	15.39
50	17.04	18.5	11.02		20.85	17.44	19.89
60	23.04	20.29	15.86		19.9	22.4	22.45
70	27.38	28.83	22.17		29.4	26.59	27.27
80	28.24	30.78	24.62		29.92	32.01	28.83
90	30.03	33.38	28.13		30.15	32.55	33.06
100	32.41	34.04	33.29		34.79	38.57	35.09
110	33.74	34.99	36.56		34.47	39.89	33.88
120	38.47	36.76	41.61		40.53	36.82	33.72
130	37.82	30.05	38.03		39.61	33.56	29.53
140	32.33	27.82	30.67		31.91	27.21	28.97
150	30.13	24.49	28.94		29.94	23.44	25.98
160	15.01	14.56	20.53		18.64	16.3	20.24
170	8.31	9.9	11.38		13.82	14.33	9.67
180	4.58	7.83	8.25		6.01	5.7	3.55
190	4.79	3.49	4.42		2.3	2.56	3.04
200	0.97	0.94	1.61		0.95	1.63	0.16
Spines	cKO	Flox
	1.91	2.04
	2.4	2.13
	2.01	2.31

## Sheet: 3F
Vglut1	Flox	cKO
	13.51	11.02
	11.14	12.43
	11.53	12.14
	12.01	12.23
Vglut2	Flox	cKO
	1.03	1.05
	1.12	1.54
	1.43	1.01
	1.34	1.25
Vgat	Flox	cKO
	6.11	5.46
	5.72	5.21
	5.63	5.65
	5.31	5.8
