# Supplementary material for: Deleting Mecp2 from the cerebellum rather than its neuronal subtypes causes a delay in motor learning in mice
Source: eLife. 2021 Jan 26;10:e64833. doi: 10.7554/eLife.64833 (PMC7837679; doi:10.7554/eLife.64833)
Supplement: Figure 4—source data 1. [file elife-64833-fig4-data1.xlsx]

## Sheet: A
En1	Flox					KO
GC	0.92	1	0.85	0.83	1.38		0.92	1.17	0.82	0.86
PC	0.97	1.19	0.99	0.92	0.92		0.97	1.06	1.02	1.01
ML	1.09	0.93	1.17	0.85	0.96		0.9	1.14	1.07	1.03
L7	Flox					KO
GC	1.08	0.96	1.05	0.91			1.13	0.92	0.97	0.83
PC	1.07	1.06	0.99	0.87			1.06	0.9	0.82	0.95
ML	1.13	1.01	0.93	0.93			1.07	1.11	1.04	0.91
Atoh1	Flox					KO
GC	0.92	1.12	0.87	0.89	1.2		0.89	0.96	0.97	0.82
PC	1.13	0.93	1.02	1.07	0.85		1.05	1.2	1.05	1.04
ML	0.99	1.01	1.11	1.14	0.75		1.14	1.2	0.93	0.87
Ptf1a	Flox					KO
GC	1.09	1.18	0.94	0.79			0.95	1.18	1.17	0.81	1.2
PC	1.14	0.84	0.94	1.08			0.98	1.04	0.88	1	0.81
ML	1.17	0.98	1.04	0.81			0.9	1.05	1.02	1.03	1.01

## Sheet: B
En1	Flox					KO
GC	0.9296	0.9713	1.1116	1.0664	0.9211		1.1091	0.8183	0.8439	1.0163
PC	1.0753	0.9725	1.1476	1.0247	0.7799		1.1583	1.1168	1.0353	1.069
ML	0.8263	1.1038	0.9017	0.9556	1.2126		0.8524	0.9244	0.9599	1.0894
L7	Flox					KO
GC	0.88	1.03	1.12	0.97			1.16	1.05	0.93	1.12
PC	0.81	0.97	1.04	1.18			1.15	1.11	1.13	0.92
ML	1.06	1.16	0.94	0.84			0.95	0.89	0.82	1.06
Atoh1	Flox					KO
GC	1.1788	0.9965	0.9525	0.8448	1.0274		1.12	1.06	0.83	0.98
PC	1.1791	1.0802	0.835	0.9564	0.9493		0.98	1.16	0.99	1.01
ML	0.9626	0.919	0.956	1.1146	1.0478		1.09	0.97	1.01	0.92
Ptf1a	Flox					KO
GC	0.91	1.08	0.88	1.13			1.01	1.19	0.91	0.93	0.98
PC	0.98	0.95	0.9	1.17			1.03	1.13	1.09	0.84	1.01
ML	1.19	0.97	0.94	0.91			0.97	1.07	0.9	1.09	0.91

## Sheet: C
En1	Flox					KO
GC	1.06	1.08	1.14	0.9	0.81		0.69	0.75	0.7	0.53
PC	0.94	1.15	0.88	1.05	0.98		0.81	0.8	0.95	0.7
ML	1.18	0.84	0.86	1.1	1.03		0.58	0.56	0.65	0.71
L7	Flox					KO
GC	0.85	1.08	1	1.07			0.92	0.95	0.91	1.05
PC	1.14	0.87	0.91	1.08			0.78	0.79	0.84	0.67
ML	0.87	1.2	0.9	1.03			1.01	1.01	0.88	0.96
Atoh1	Flox					KO
GC	0.86	0.97	1.14	1	1.04		0.76	0.82	0.63	0.65
PC	0.86	0.99	1.15	0.87	1.13		0.9	0.93	1.09	0.86
ML	1.05	1.04	1.02	0.94	0.94		1.03	1	0.9	0.98
Ptf1a	Flox					KO
GC	0.95	0.94	1.02	1.1			0.87	0.93	0.99	0.94	1.02
PC	1.17	0.93	0.85	1.04			0.82	0.86	0.82	0.67	0.88
ML	0.87	1.14	0.94	1.05			0.63	0.76	0.78	0.68	0.57

## Sheet: D
En1	Flox					KO
GC	0.99	1.2	0.89	1.02	0.9		1.1091	0.8183	0.8439	1.0163
PC	0.85	1.18	0.94	0.91	1.13		1.1583	0.9168	1.0353	1.069
ML	0.82	1	1.05	0.93	1.19		0.8524	0.8244	0.9599	1.0894
L7	Flox					KO
GC	1.04	1.1	1.1	0.76			1.16	1.05	0.93	1.12
PC	1.06	1.11	1.02	0.82			1.15	1.11	1.13	0.92
ML	0.89	0.83	1.19	1.1			0.95	0.89	0.82	1.06
Atoh1	Flox					KO
GC	0.83	0.87	1.15	0.89	1.26		1.12	1.06	0.83	0.98
PC	1.01	1.05	0.87	1.1	0.97		0.98	1.16	0.99	1.01
ML	1.05	1.12	0.98	1.02	0.83		1.09	0.97	1.01	0.92
Ptf1a	Flox					KO
GC	1.03	0.92	0.81	1.24			1.01	1.19	0.91	0.93	0.98
PC	0.96	0.98	1.19	0.86			1.03	1.13	1.09	0.84	1.01
ML	1.01	0.96	1.2	0.83			0.97	1.07	0.9	1.09	0.91
