# Supplementary material for: Deleting Mecp2 from the cerebellum rather than its neuronal subtypes causes a delay in motor learning in mice
Source: eLife. 2021 Jan 26;10:e64833. doi: 10.7554/eLife.64833 (PMC7837679; doi:10.7554/eLife.64833)
Supplement: Source data 1. [file elife-64833-data1.xlsx]

## Sheet: Sheet1
Figure	Statistical test	Comparison	Adjusted p-value	Star annotation
Figure 2B	Two-way ANOVA with Tukey's multiple comparisons test	Day 1
		WT vs. Cre	ns	0.6471
		WT vs. Flox	ns	0.903
		WT vs. KO	****	<0.0001
		Cre vs. Flox	ns	0.23
		Cre vs. KO	**	0.0032
		Flox vs. KO	****	<0.0001
		Day 2
		WT vs. Cre	ns	0.9255
		WT vs. Flox	ns	0.9996
		WT vs. KO	****	<0.0001
		Cre vs. Flox	ns	0.9516
		Cre vs. KO	****	<0.0001
		Flox vs. KO	****	<0.0001
		Day 3
		WT vs. Cre	ns	0.7033
		WT vs. Flox	ns	0.9529
		WT vs. KO	***	0.0001
		Cre vs. Flox	ns	0.9386
		Cre vs. KO	**	0.0062
		Flox vs. KO	***	0.0007
		Day 4
		WT vs. Cre	ns	0.211
		WT vs. Flox	ns	0.8331
		WT vs. KO	ns	0.075
		Cre vs. Flox	ns	0.6584
		Cre vs. KO	ns	0.9622
		Flox vs. KO	ns	0.356
Figure 2C	Two-way ANOVA with Tukey's multiple comparisons test	Day 1
		WT vs. Cre	ns	0.4427
		WT vs. Flox	ns	0.8754
		WT vs. KO	ns	0.9987
		Cre vs. Flox	ns	0.0953
		Cre vs. KO	ns	0.4993
		Flox vs. KO	ns	0.7804
		Day 2
		WT vs. Cre	ns	0.9694
		WT vs. Flox	ns	0.9784
		WT vs. KO	ns	0.8346
		Cre vs. Flox	ns	>0.9999
		Cre vs. KO	ns	0.9797
		Flox vs. KO	ns	0.9672
		Day 3
		WT vs. Cre	ns	0.9973
		WT vs. Flox	ns	0.8835
		WT vs. KO	ns	0.6649
		Cre vs. Flox	ns	0.9474
		Cre vs. KO	ns	0.7707
		Flox vs. KO	ns	0.9741
		Day 4
		WT vs. Cre	ns	0.774
		WT vs. Flox	ns	0.5317
		WT vs. KO	ns	0.3992
		Cre vs. Flox	ns	0.9806
		Cre vs. KO	ns	0.9296
		Flox vs. KO	ns	0.9959
		Day 1
		WT vs. Cre	ns	>0.9999
		WT vs. Flox	ns	0.7579
		WT vs. KO	ns	0.9891
		Cre vs. Flox	ns	0.7653
		Cre vs. KO	ns	0.9847
		Flox vs. KO	ns	0.583
		Day 2
		WT vs. Cre	ns	0.9554
		WT vs. Flox	ns	0.8241
		WT vs. KO	ns	0.778
		Cre vs. Flox	ns	0.9815
		Cre vs. KO	ns	0.9661
		Flox vs. KO	ns	0.9998
		Day 3
		WT vs. Cre	ns	0.8574
		WT vs. Flox	ns	0.3379
		WT vs. KO	ns	>0.9999
		Cre vs. Flox	ns	0.0658
		Cre vs. KO	ns	0.8786
		Flox vs. KO	ns	0.344
		Day 4
		WT vs. Cre	ns	0.5695
		WT vs. Flox	ns	0.0632
		WT vs. KO	ns	0.092
		Cre vs. Flox	ns	0.5668
		Cre vs. KO	ns	0.668
		Flox vs. KO	ns	0.9987
		Day 1
		WT vs. Cre	ns	0.7359
		WT vs. Flox	ns	0.6121
		WT vs. KO	ns	0.92
		Cre vs. Flox	ns	0.9977
		Cre vs. KO	ns	0.3406
		Flox vs. KO	ns	0.2373
		Day 2
		WT vs. Cre	ns	0.999
		WT vs. Flox	ns	0.959
		WT vs. KO	ns	0.638
		Cre vs. Flox	ns	0.9836
		Cre vs. KO	ns	0.7105
		Flox vs. KO	ns	0.8842
		Day 3
		WT vs. Cre	ns	0.991
		WT vs. Flox	ns	0.4499
		WT vs. KO	ns	0.881
		Cre vs. Flox	ns	0.2648
		Cre vs. KO	ns	0.7199
		Flox vs. KO	ns	0.8916
		Day 4
		WT vs. Cre	ns	0.0762
		WT vs. Flox	ns	0.5518
		WT vs. KO	ns	0.9986
		Cre vs. Flox	ns	0.6413
		Cre vs. KO	ns	0.0511
		Flox vs. KO	ns	0.4498
Figure 2E	Two-way ANOVA with Tukey's multiple comparisons test	Flox - KO
		Day 1	ns	>0.9999
		Day 2	ns	>0.9999
		Day 3	ns	0.9929
		Day 4	**	0.0084
		Day 5	****	<0.0001
		Day 6	*	0.0238
		Day 7	ns	0.0526
		Day 8	ns	0.6865
		Day 9	ns	>0.9999
		Day 10	ns	>0.9999
		Day 11	ns	>0.9999
		Day 12	ns	0.9993
		Flox - KO
		Day 1	ns	>0.9999
		Day 2	ns	>0.9999
		Day 3	ns	0.9997
		Day 4	**	0.0011
		Day 5	****	<0.0001
		Day 6	*	0.0308
		Day 7	ns	0.3755
		Day 8	ns	0.2544
		Day 9	ns	0.9413
		Day 10	ns	0.9482
		Day 11	ns	>0.9999
		Day 12	ns	0.9986
Figure 2-supplement 1	Unpaired, two-tailed student's t-test	Flox - KO
		Cerebellum	****	<0.0001
		Hippocampus	ns	0.9656
Figure 2-supplement 3A	Two-way ANOVA with Tukey's multiple comparisons test	Day 1
		WT vs. Cre	ns	0.8761
		WT vs. Flox	ns	0.3585
		WT vs. cKO	ns	0.9581
		Cre vs. Flox	ns	0.1063
		Cre vs. cKO	ns	0.6145
		Flox vs. cKO	ns	0.6671
		Day 2
		WT vs. Cre	ns	0.8299
		WT vs. Flox	ns	0.4662
		WT vs. cKO	ns	0.6359
		Cre vs. Flox	ns	0.9574
		Cre vs. cKO	ns	0.9941
		Flox vs. cKO	ns	0.9931
		Day 3
		WT vs. Cre	ns	0.6932
		WT vs. Flox	ns	0.7069
		WT vs. cKO	ns	0.6264
		Cre vs. Flox	ns	0.9997
		Cre vs. cKO	ns	>0.9999
		Flox vs. cKO	ns	0.9992
		Day 4
		WT vs. Cre	ns	0.9992
		WT vs. Flox	ns	0.7129
		WT vs. cKO	ns	0.9399
		Cre vs. Flox	ns	0.6766
		Cre vs. cKO	ns	0.9098
		Flox vs. cKO	ns	0.9615
Figure 2-supplement 3B	Two-way ANOVA with Tukey's multiple comparisons test	Day 1
		WT vs. Cre	ns	0.5173
		WT vs. Flox	ns	0.3554
		WT vs. cKO	ns	0.1103
		Cre vs. Flox	ns	0.9952
		Cre vs. cKO	ns	0.7831
		Flox vs. cKO	ns	0.8851
		Day 2
		WT vs. Cre	ns	0.9995
		WT vs. Flox	ns	0.656
		WT vs. cKO	ns	0.9374
		Cre vs. Flox	ns	0.7374
		Cre vs. cKO	ns	0.9659
		Flox vs. cKO	ns	0.9601
		Day 3
		WT vs. Cre	ns	0.9928
		WT vs. Flox	ns	0.8303
		WT vs. cKO	ns	0.9952
		Cre vs. Flox	ns	0.9441
		Cre vs. cKO	ns	0.9609
		Flox vs. cKO	ns	0.7309
		Day 4
		WT vs. Cre	ns	0.9956
		WT vs. Flox	ns	0.9408
		WT vs. cKO	ns	0.921
		Cre vs. Flox	ns	0.9879
		Cre vs. cKO	ns	0.9774
		Flox vs. cKO	ns	0.9996
Figure 2-supplement 3C	One-way ANOVA with Tukey's multiple comparisons test	WT vs. Cre	ns	0.8147
		WT vs. Flox	ns	0.9526
		WT vs. cKO	ns	0.7641
		Cre vs. Flox	ns	0.9819
		Cre vs. cKO	ns	0.9997
		Flox vs. cKO	ns	0.9651
Figure 2-supplement 3D	One-way ANOVA with Tukey's multiple comparisons test	WT vs. Cre	ns	0.5476
		WT vs. Flox	ns	0.9749
		WT vs. cKO	ns	0.666
		Cre vs. Flox	ns	0.2838
		Cre vs. cKO	ns	0.0682
		Flox vs. cKO	ns	0.8761
Figure 2-supplement 3E	One-way ANOVA with Tukey's multiple comparisons test	WT vs. Cre	ns	0.9826
		WT vs. Flox	ns	0.9975
		WT vs. cKO	ns	0.9962
		Cre vs. Flox	ns	0.9388
		Cre vs. cKO	ns	0.9988
		Flox vs. cKO	ns	0.9743
Figure 2-supplement 3F	One-way ANOVA with Tukey's multiple comparisons test	WT vs. Cre	ns	0.8313
		WT vs. Flox	ns	0.9537
		WT vs. cKO	ns	0.9795
		Cre vs. Flox	ns	0.9858
		Cre vs. cKO	ns	0.9665
		Flox vs. cKO	ns	0.9993
Figure 2-supplement 3G	One-way ANOVA with Tukey's multiple comparisons test	WT vs. Cre	ns	0.8876
		WT vs. Flox	ns	0.8144
		WT vs. cKO	ns	0.9948
		Cre vs. Flox	ns	0.3632
		Cre vs. cKO	ns	0.9618
		Flox vs. cKO	ns	0.6613
Figure 2-supplement 3H	Two-way ANOVA with Tukey's multiple comparisons test	74 db
		WT vs. Cre	ns	0.6884
		WT vs. Flox	ns	0.4856
		WT vs. cKO	ns	0.9966
		Cre vs. Flox	ns	0.0509
		Cre vs. cKO	ns	0.5403
		Flox vs. cKO	ns	0.6093
		78 db
		WT vs. Cre	ns	0.0529
		WT vs. Flox	ns	0.9998
		WT vs. cKO	ns	0.5413
		Cre vs. Flox	ns	0.0529
		Cre vs. cKO	ns	0.5925
		Flox vs. cKO	ns	0.5662
		82 db
		WT vs. Cre	ns	0.7955
		WT vs. Flox	ns	0.9997
		WT vs. cKO	ns	0.9961
		Cre vs. Flox	ns	0.8279
		Cre vs. cKO	ns	0.6537
		Flox vs. cKO	ns	0.9885
Figure 2-supplement 3I	Two-way ANOVA with Tukey's multiple comparisons test	Object
		WT vs. Cre	ns	0.9948
		WT vs. Flox	ns	0.9068
		WT vs. cKO	ns	0.9856
		Cre vs. Flox	ns	0.7839
		Cre vs. cKO	ns	0.9312
		Flox vs. cKO	ns	0.9878
		Mouse
		WT vs. Cre	ns	>0.9999
		WT vs. Flox	ns	0.9973
		WT vs. cKO	ns	0.9366
		Cre vs. Flox	ns	0.9943
		Cre vs. cKO	ns	0.9486
		Flox vs. cKO	ns	0.8532
Figure 2-supplement 3J	One-way ANOVA with Tukey's multiple comparisons test	WT vs. Cre	ns	0.9475
		WT vs. Flox	ns	0.764
		WT vs. cKO	ns	0.9965
		Cre vs. Flox	ns	0.4123
		Cre vs. cKO	ns	0.9867
		Flox vs. cKO	ns	0.6215
Figure 2-supplement 3K	One-way ANOVA with Tukey's multiple comparisons test	WT vs. Cre	ns	0.7157
		WT vs. Flox	ns	>0.9999
		WT vs. cKO	ns	0.8329
		Cre vs. Flox	ns	0.7344
		Cre vs. cKO	ns	0.9963
		Flox vs. cKO	ns	0.8513
Figure 3D	Unpaired, two-tailed student's t-test	Flox - KO
		SS Hz	ns	0.2764
		CS Hz	ns	0.3763
		CV2	**	0.0026
		CV2	**	0.0084
Figure 3E	Two-way ANOVA with Tukey's multiple comparisons test	Flox - KO
		10	ns	>0.9999
		20	ns	>0.9999
		30	ns	>0.9999
		40	ns	0.9995
		50	ns	0.8692
		60	ns	>0.9999
		70	ns	>0.9999
		80	ns	0.9962
		90	ns	>0.9999
		100	ns	0.9823
		110	ns	>0.9999
		120	ns	0.9995
		130	ns	>0.9999
		140	ns	>0.9999
		150	ns	>0.9999
		160	ns	>0.9999
		170	ns	0.9823
		180	ns	>0.9999
		190	ns	>0.9999
		200	ns	>0.9999
	Unpaired, two-tailed student's t-test	Flox - KO
		Spine density	ns	0.8593
Figure 3F	Unpaired, two-tailed student's t-test	Flox - KO
		Vglut1	ns	0.8755
		Vglut2	ns	0.8725
		Vgat	ns	0.4679
Figure 4A	Unpaired, two-tailed student's t-test	Flox - KO
		GC		0.700025
		PC		0.781257
		ML		0.670187
		GC		0.631327
		PC		0.377092
		ML		0.630126
		GC		0.308291
		PC		0.237285
		ML		0.748222
		GC		0.60919
		PC		0.472734
		ML		0.978646
Figure 4B	Unpaired, two-tailed student's t-test	Flox - KO
		GC		0.500981
		PC		0.242749
		ML		0.645495
		GC		0.397453
		PC		0.43883
		ML		0.448333
		GC		0.976723
		PC		0.661968
		ML		0.962425
		GC		0.960674
		PC		0.801667
		ML		0.845474
Figure 4C	Unpaired, two-tailed student's t-test	Flox - KO
		GC		0.00479459
		PC		0.0323482
		ML		0.00236261
		GC		0.5184
		PC		0.0213343
		ML		0.681459
		GC		0.00315652
		PC		0.527521
		ML		0.593885
		GC		0.26991
		PC		0.0389258
		ML		0.0024945
Figure 4C	Unpaired, two-tailed student's t-test	Flox - KO
		GC		0.565912
		PC		0.631192
		ML		0.472675
		GC		0.521962
		PC		0.400169
		ML		0.492392
		GC		0.982821
		PC		0.562946
		ML		0.969537
		GC		0.9687
		PC		0.794251
		ML		0.886304
